# Supplementary material for: Screening of molecular targets and construction of a ceRNA network for oxaliplatin resistance in colorectal cancer
Source: Royal Society of Chemistry journal article supplement (doi:10.1039/c9ra06146k), 2019-01-01
Supplement: c9ra06146k1.pdf [file c9ra06146k1.pdf]

1 **Table S1. The primers and thermocycling conditions of PCR analysis**

| <b>RNAs</b>     | <b>Premiers</b>                                                   | <b>Thermocycling conditions</b>                                                                                  |
|-----------------|-------------------------------------------------------------------|------------------------------------------------------------------------------------------------------------------|
| TUG1            | F: GGAGTGGATGTGTTCTGTAGCA<br>R: TCGTGGAATATGGTCAATGAGAGT          | a. 1x (3 min at 95°C)<br>b. 30x (30 s at 95°C, 30 s at 65°C, 30 s at 72°C)                                       |
| HOTAIR          | F: CGCCAGACGAAGGTGAAAGC<br>R: TGCCCTCTGCCACGTTTGT                 | a. 1x (3 min at 95°C)<br>b. 45x (30 s at 95°C, 30 s at 60°C, 30 s at 72°C)                                       |
| HNF1A-AS1       | F: GCAGAATTAGGATTTGAACCCAGAT<br>R: ACAACAACAACAAAAGTAATAGTAACACAT | a. 1x (3 min at 95°C)<br>b. 45x (30 s at 95°C, 30 s at 60°C, 30 s at 72°C)                                       |
| TTY15           | F: CCCCTTCCCCGTTTGTGAGTC<br>R: ATATCTAAGAAGTATGTTGGTTCAGTCT       | a. 1x (3 min at 95°C)<br>b. 45x (30 s at 95°C, 30 s at 60°C, 30 s at 72°C)                                       |
| ZNF503-AS1      | F: TCCCTCCCGAGCCCTACA<br>R: TGCTGGAAGTTTCTGGGAATGT                | a. 1x (3 min at 95°C)<br>b. 35x (30 s at 95°C, 30 s at 65°C, 30 s at 72°C)                                       |
| ZNF148          | F: GCTGTGGCAAGTGCATTGAT<br>R: GCAGTACCTCATCTGGAATAACATT           | a. 1x (3 min at 95°C)<br>b. 35x (30 s at 95°C, 30 s at 65°C, 30 s at 72°C)                                       |
| PLAG1           | F: ATATCCGTTTCAGTTCTACCTCATAT<br>R: TGCTTGAGAATCTTGGGATGAA        | a. 1x (3 min at 95°C)<br>b. 40x (30 s at 95°C, 30 s at 65°C, 30 s at 72°C)                                       |
| SEMA5A          | F: GATCCTGCCATTTACCGAAGC<br>R: AGATGACACAAAGTTTGGCTCA             | a. 1x (3 min at 95°C)<br>b. 40x (30 s at 95°C, 30 s at 55°C, 30 s at 72°C)                                       |
| SORL1           | F: TGTTATCGCCCAGTTCTACCA<br>R: GCCTTGAAGAGTGTTCAGAA               | a. 1x (3 min at 95°C)<br>b. 35x (30 s at 95°C, 30 s at 65°C, 30 s at 72°C)                                       |
| TMEM2           | F: CAGGAACGGTTGGGAAGTG<br>R: TTTCATAGTTTCTCACGGATTCATT            | a. 1x (3 min at 95°C)<br>b. 5x (30 s at 95°C, 30 s at 70°C)<br>c. 25x (30 s at 95°C, 30 s at 45°C, 30 s at 72°C) |
| hsa-miR-449a    | F: GCCTGGCAGTGTATTGTTAGCTGGT                                      | a. 1x (3 min at 95°C)<br>b. 35x (30 s at 95°C, 30 s at 60°C)                                                     |
| hsa-miR-485-5p  | F: GAGAGGCTGGCCGTGATGAATTC                                        | a. 1x (3 min at 95°C)<br>b. 40x (30 s at 95°C, 30 s at 65°C)                                                     |
| hsa-miR-520c-3p | F: GGCCAaagtgcttccttttagagggt                                     | a. 1x (3 min at 95°C)<br>b. 45x (30 s at 95°C, 30 s at 50°C, 30 s at 72°C)                                       |
| hsa-miR-520e    | F: GGCGAaagtgcttccttttagagg                                       | a. 1x (3 min at 95°C)<br>b. 5x (30 s at 95°C, 30 s at 70°C)<br>c. 35x (30 s at 95°C, 30 s at 55°C)               |
| hsa-miR-520b    | F: CCGGGCAaagtgcttccttta                                          | a. 1x (3 min at 95°C)<br>b. 35x (30 s at 95°C, 30 s at 65°C)                                                     |

|          |                                     |                                  |
|----------|-------------------------------------|----------------------------------|
| 18sRNA-H | F: AGTCGCCGTGCCTACCAT               | As a reference gene for mRNA and |
|          | R: CGGGTCGGGAGTGGGTAAT              | lncRNA                           |
| U6       | F: GTGCTCGCTTCGGCAGCACATATACTAAA    | As a reference gene for miRNA    |
|          | R: CTGTCAACGATACGCTACGTAACGGCATGACA |                                  |

2

3
